# Supplementary material
Source: PubMed Central journal article supplement (PMC2567164)
Supplement: 0803873105_0803873105SI.pdf [file 0803873105_0803873105SI.pdf]

# Supporting Information

Silva et al. 10.1073/pnas.0803873105

## Materials and Methods

**Human Umbilical Cord Blood Mononuclear Cell Preparation and Culture.** Human cord bloods (50–80 cc) were obtained from the National Disease Research Interchange (Philadelphia, PA). Human umbilical cord blood mononuclear cells (CBMNCs) were obtained as previously described with some modifications. Specifically, blood was diluted 1:1 with Hanks balanced salt solution (HBSS; Sigma) and layered over an equivalent volume of Histopaque 1077 (Sigma). Cells were centrifuged for 30 min at room temperature at  $400 \times g$  for the early endothelial progenitor cells (EPCs) preparation. To obtain EPCs, the isolated CBMNCs were resuspended in EGM-2 MV medium (Cambrex) consisting of EMB2, 5% fetal bovine serum, hEGF, VEGF, hFGF-B, IGF-1, ascorbic acid, and antibiotics, and  $1 \times 10^6$  CBMNCs per  $\text{cm}^2$  were seeded on fibronectin-coated (Sigma) tissue culture plates and incubated in 5%  $\text{CO}_2$  incubation at  $37^\circ\text{C}$ . At  $\approx 5$  days after plating, nonadherent cells were aspirated and adherent cells were gently washed twice with culture media. Adherent cells (EPCs) were detached with 0.25% trypsin-EDTA (Mediatech), washed and used in experiments.

To obtain OECs, blood diluted 1:1 with HBSS was centrifuged at  $740 \times g$ , and the resultant CBMNCs were cultured on type I collagen-coated tissue culture plates (BD Biosciences) with EGM2-MV medium supplemented with 10% fetal bovine serum (FBS; Gibco). After 36 h of culture, nonadherent cells were removed and adherent cells were washed once with medium. Medium was changed daily for 7 days and then every other day until the first passage. Colonies of OECs appeared at between 7 and 14 days of culture. OECs derived from the colony were released from the original tissue culture plate with 0.05% trypsin-EDTA (Invitrogen), resuspended in EGM2-MV medium, and plated onto 25- $\text{cm}^2$  tissue culture flasks. OECs at second passage were used for *in vivo* experiments, and at passage 3 for *in vitro* experiments. EPCs and OECs were isolated from human cord blood 7 times, and similar results were obtained from each donor.

To characterize cells with immunohistochemistry markers,  $1 \times 10^4$  OECs and EPCs were cultured on fibronectin-coated chamber slides (Nalgen Nunc) for 12 h. Cells were fixed with an ice-cold acetone/methanol solution (1:1) for 10 min, and incubated at room temperature for 30 min with primary antibodies, followed by 10-min incubations with LSAB2 link-biotin and streptavidin-HRP (DAKO), and then developed with DAB solution (DAKO) for 5 min. The following primary antibodies were utilized: anti-CD14, anti-CD31, anti-CD34, anti-CD144 (all from DAKO), anti-VEGFR-2 (Sigma), and VWF BD-Biosciences). Slides were analyzed by visual inspection under  $\times 100$  magnification.

For flow cytometry, OECs from passage 2–3 were washed with PBS and trypsinated and resuspended with fresh media and placed in a T25 flask and further incubated for 6–10 h on a rocker platform ( $37^\circ\text{C}$ , 5%  $\text{CO}_2$ ) to enable the regeneration of receptors. Cells were then incubated for 45 min on ice with labeled specific antibodies ( $0.25 \mu\text{g}/10^5$  cells) for anti-human VEGFR2-PE, anti-human CD144-PE (both R&D Systems), anti-human CD14-PE, anti-human CD45-FITC, anti-human CD31-FITC (all BD Biosciences). Because isotypic controls were used mouse anti-IgG1-PE, mouse anti-IgG1-FITC, and mouse anti-IdG2b-PE (all BD Biosciences). Instrument settings for scatter parameters and background fluorescence were tested and adjusted for untreated cells. For each experiment, 10,000 cells were counted in triplicate. Analyses were repeated with cells from distinct donors by using the exact same instrument settings.

**Macroporous Alginate Scaffolds.** Alginate molecules rich in gulonic acid blocks (LF 20/40, FMC Biopolymer) were first oxidized by using sodium periodate ( $\text{NaIO}_4$ ), as described, to generate hydrolytically labile polymers. In brief,  $\text{NaIO}_4$  was added to 1% (w/w) aqueous solutions of alginate. The molar ratio between  $\text{NaIO}_4$  and uronic acids was kept constant at 0.01:1. After 10 h, ethylene glycol was added to stop the reaction, and the oxidized alginates were dialyzed against deionized water for 2 days (molecular weight cutoff, 3,500) followed by lyophilization. Then, oxidized alginates were coupled with oligopeptides containing the Arg-Gly-Asp cell adhesion sequence (Commonwealth Biotech) following aqueous carbodiimide chemistry as described. In brief, *N*-hydroxysulfosuccinimide (sulfo-NHS, Pierce), 1-ethyl-3-(dimethylaminopropyl) carbodiimide (EDC, Sigma), and oligopeptides (GGGGRGDSP) were sequentially added to alginates dissolved in 2-(*N*-morpholino) ethanesulfonic acid (MES, Sigma) buffer at pH 6.5. The molar ratio between oligopeptides and uronic acids was kept constant at 1:1000, yielding two oligopeptides per alginate molecule. After reaction for 24 h, alginate molecules modified with RGD peptides were purified with dialysis against deionized water for 4 days. After lyophilization, the samples were reconstituted with EBM cell culture medium (Cambrex) at 2% (w/w).

Hydrogels were prepared by mixing the alginate solution with a calcium sulfate slurry, and the molar ratio between calcium and uronic acids was kept constant at 0.40. The mixture was injected between glass plates with a spacer of 1 mm. After curing for 20 min, gel disks with a diameter of 10 mm were punched out. These gel disks were frozen and stored at  $-20^\circ\text{C}$ , and after 24 h, gel disks were lyophilized to yield macroporous materials. Gel disks were soaked with a cell suspension to infiltrate cells into pores.

To incorporate VEGF, alginate solutions were mixed with recombinant human VEGF<sub>121</sub> (R & D Systems) or VEGF<sub>165</sub> protein (Biological Resources Branch of National Cancer Institute) before formation of gels and macroporous scaffolds. The alginate/VEGF solutions were then fabricated into macroporous scaffolds as described above.

**In Vitro Cell Assays.** The ability of cells to migrate outward from macroporous alginate scaffolds with no VEGF, or from scaffolds containing VEGF<sub>121</sub> or VEGF<sub>165</sub> ( $1 \mu\text{g}$  total incorporated per scaffold, respectively), was analyzed by seeding  $5 \times 10^5$  of OECs (passage 3) into the scaffolds, and then placing the scaffolds in contact with a collagen gel (3.0 mg/ml) (PureCol). The combined scaffold and collagen gel was then cultured with EBM2-MV without growth factors (Cambrex) media at  $37^\circ\text{C}$ . At different experimental time points, the scaffold was removed and the cells that had populated the collagen gel were obtained by washing the collagen gels, and dissolving the gels, and counting cells in a Coulter Counter (Beckman Corp.). The total number of cells that migrated out of the scaffold was normalized to the total number of cells seeded initially into scaffolds. The viability of the cells populating the collagen gel was quantified by trypan blue exclusion with a Viacell Counter (Beckman Corp.).

The ability of the EPCs and OECs to modulate angiogenesis was analyzed *in vitro* by using an endothelial cell sprouting assay. Cytodex 3 microcarriers (Amersham Biosciences) were hydrated in PBS at room temperature (0.2 ml/mg of dry Cytodex 3), and after 3 h the supernatant was decanted and replaced with fresh PBS, followed by sterilization with autoclaving. EPCs, OECs (passage 3), and HMVEC-d (Cambrex) (ECs) (passage 5), alone, selectively cocultured (ECs/OECs, 1:1 ratio), or seeded all





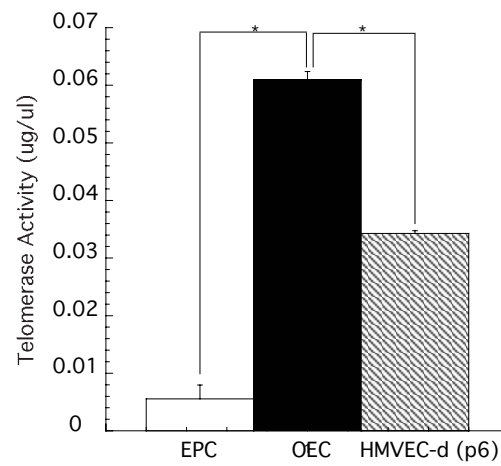

**Fig. S2.** Telomerase activity of cultured EPCs, OECs, and ECs (passage 6). Values represent mean and standard deviation.

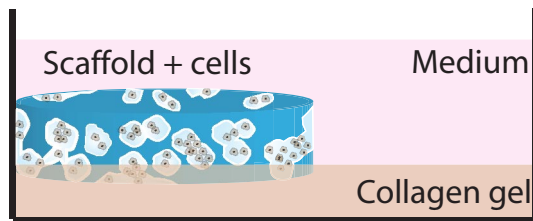

Fig. S3. Cell migration assays. Diagram of the approach used to investigate the cell migration out of scaffolds.

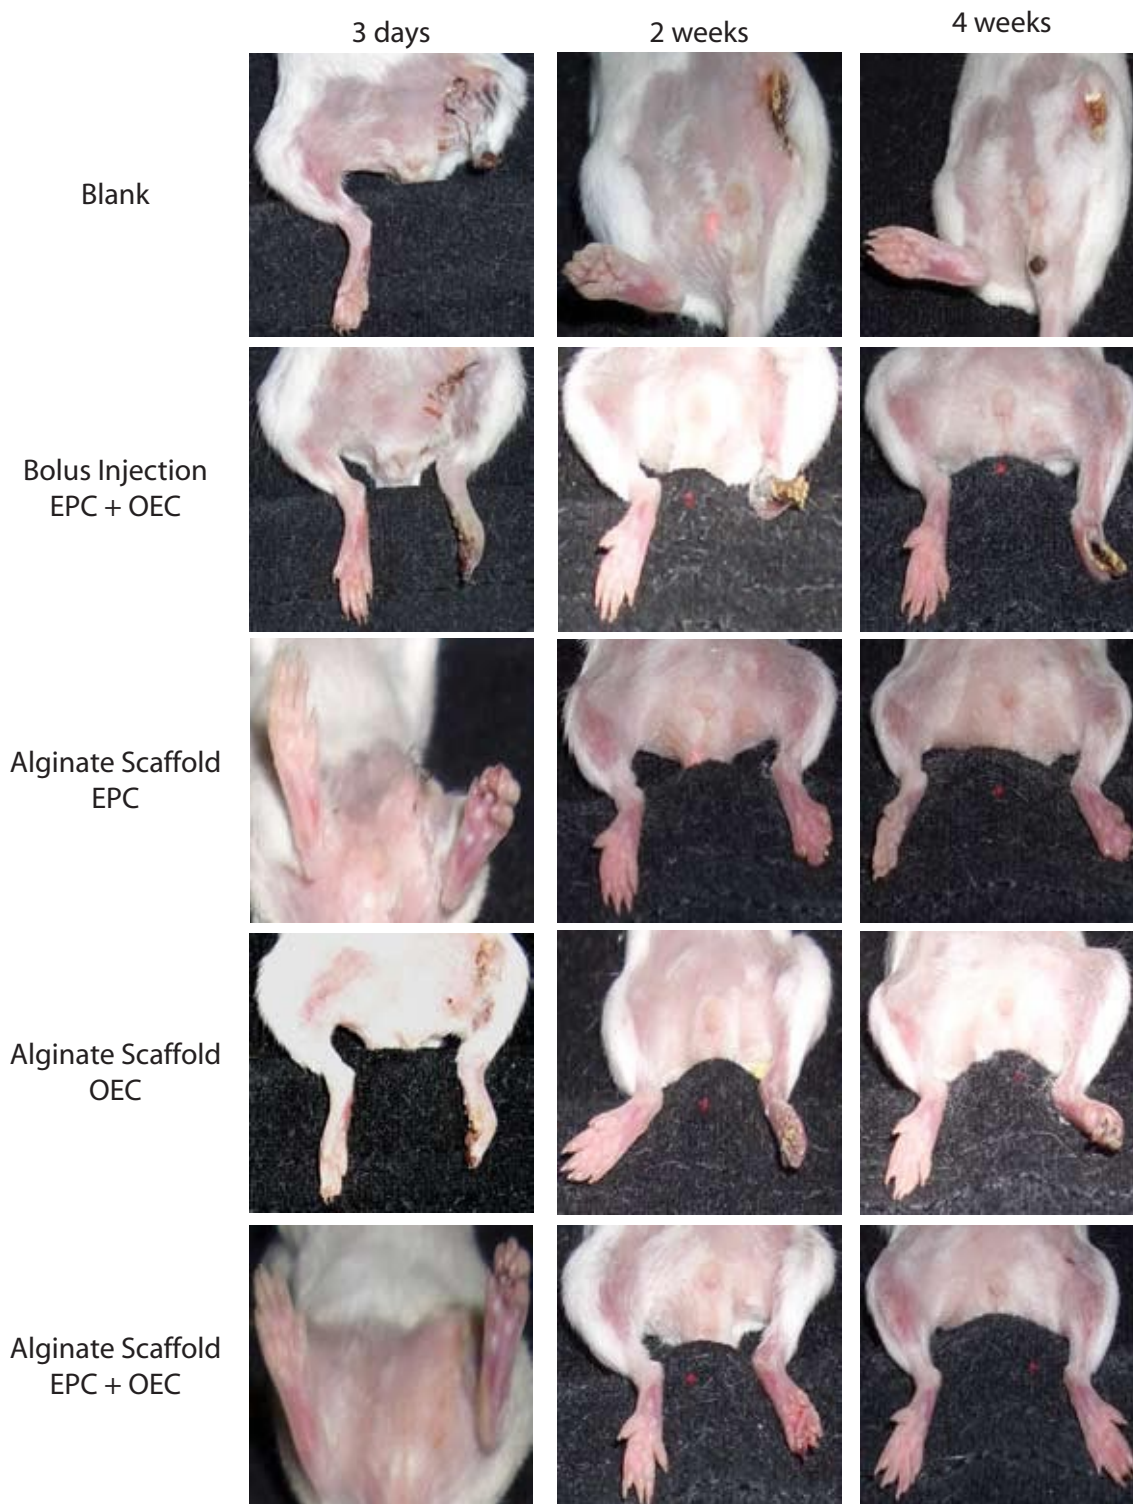

**Fig. S4.** Gross photographs of ischemic hindlimbs as a function of time postsurgery. Limbs with no treatment (blank scaffold), demonstrated a dramatic and rapid limb necrosis, resulting in autoamputation. Animals treated with bolus injection of EPCs and OECs had progressive limb necrosis over time. Transplantation of either EPC or OEC alone in scaffolds decreased the progression toward limb necrosis. Finally, transplantation of scaffolds loaded with the EPCs and OECs resulted in a reversion of limb necrosis and ischemia.

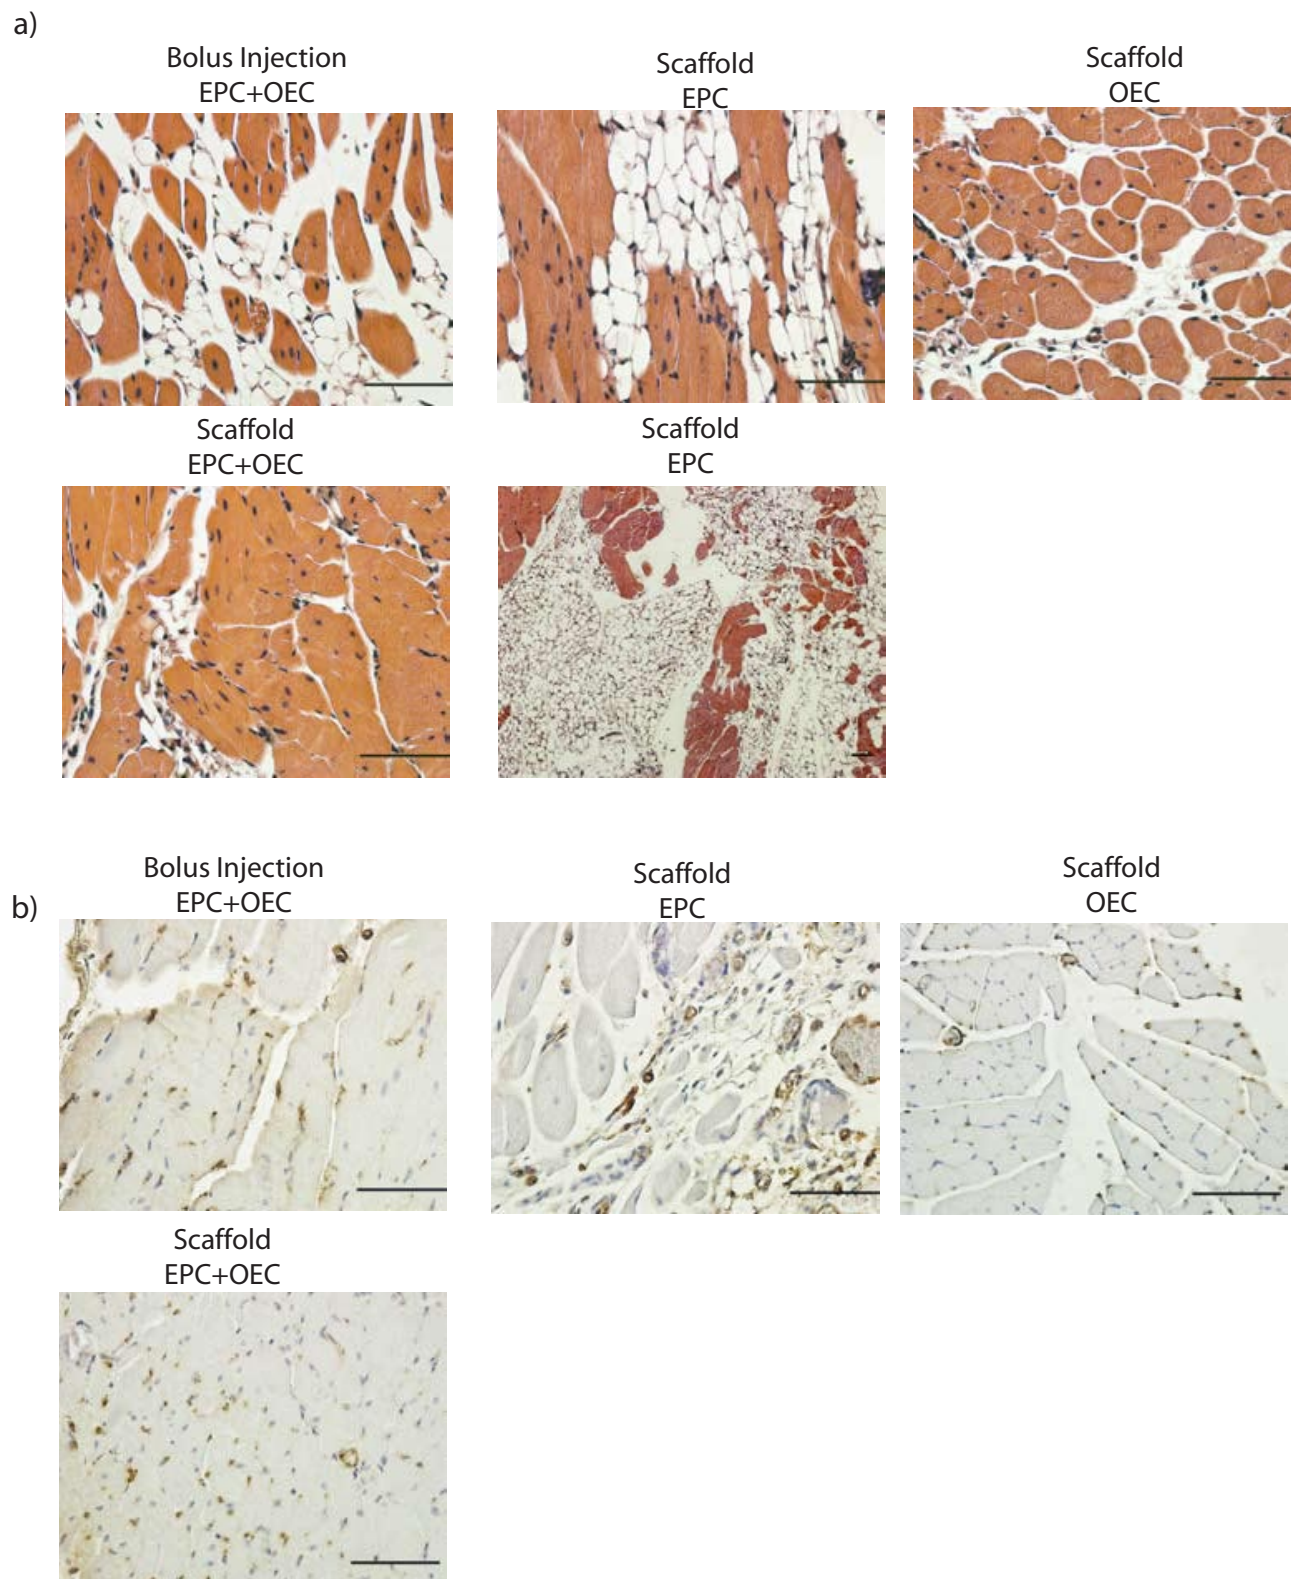

**Fig. S5.** Histologic analysis of ischemic hindlimb tissue sections after cell transplantation. (a) H&E photomicrographs of tissue sections from ischemic hindlimbs of SCID mice at 6 weeks postsurgery. All animals receiving EPCs demonstrated significant adipose tissue in the transplanted limb. (b) Photomicrographs of tissue immunostained for the mouse endothelial cell marker CD-31. Transplanting EPCs or OECs alone from scaffolds resulted in a significant increase in capillary density in hindlimb muscle, compared with bolus injection, and cotransplantation led to the highest densities of capillaries. (Scale bars, 50  $\mu$ m.)

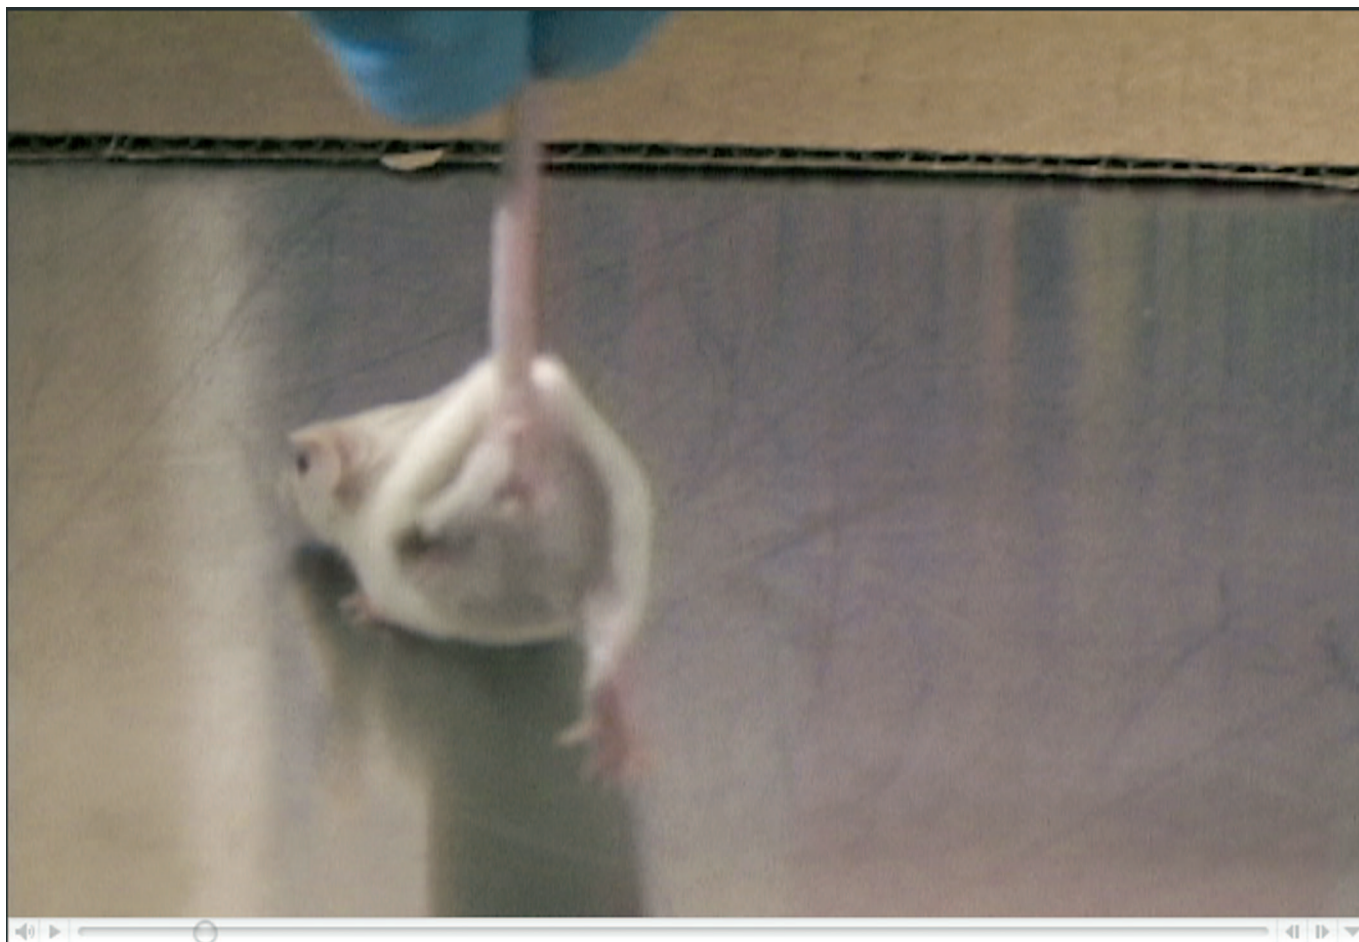

**Movie S1.** Video of a mouse treated with a blank scaffold, a mouse treated with a bolus injection of EPCs and OECs, and EPCs and OECs delivered from a scaffold. Finally, two mice, one that did not receive a femoral artery ligation (normal; nonoperated) (*Right*) and operated mouse treated with EPCs and OECs transplanted on a scaffold (*Left*) are compared.

[Movie S1 \(MOV\)](#)
